# Supplementary material for: “On–off–on” fluorescent sensor based on Ti3C2 quantum dots and CoOOH nanosheets for the detection of ascorbic acid
Source: Royal Society of Chemistry journal article supplement (doi:10.1039/d3nj04736a), 2024-01-01
Supplement: d3nj04736a5.pdf [file d3nj04736a5.pdf]

Supporting information

**“On–off–on” fluorescent sensor based on Ti<sub>3</sub>C<sub>2</sub> quantum dots and  
CoOOH nanosheets for the detection of ascorbic acid**

*Feifan Hu,<sup>‡ a</sup> Yong Mao,<sup>‡ b</sup> Jianzhen Huang,<sup>a</sup> Wan Li,<sup>a</sup> Song Liu,<sup>a</sup> Zhiwei Wen<sup>a</sup> and  
Fanrong Ai <sup>\*a</sup>*

a. School of Advanced Manufacturing, Nanchang University, Nanchang, 330031,

China

b. Jiangxi Provincial Drug Certification and Evaluation Center, Nanchang, 330046,

China

\* Corresponding authors: Fanrong Ai, E-mail: aifanrong@ncu.edu.cn

<sup>‡</sup> These authors contributed equally

## Counts

Fig. S1. Graphs of XPS for  $\text{Ti}_3\text{C}_2$  QDs.

Fig. S2. Research on the stability of  $\text{Ti}_3\text{C}_2$  QDs, including temperature, time and pH.

Fig. S3. Research on the effect of  $\text{Co}^{2+}$  on the fluorescence of  $\text{Ti}_3\text{C}_2$  QDs.

Table S1. Comparison of quantum yields in different reports.

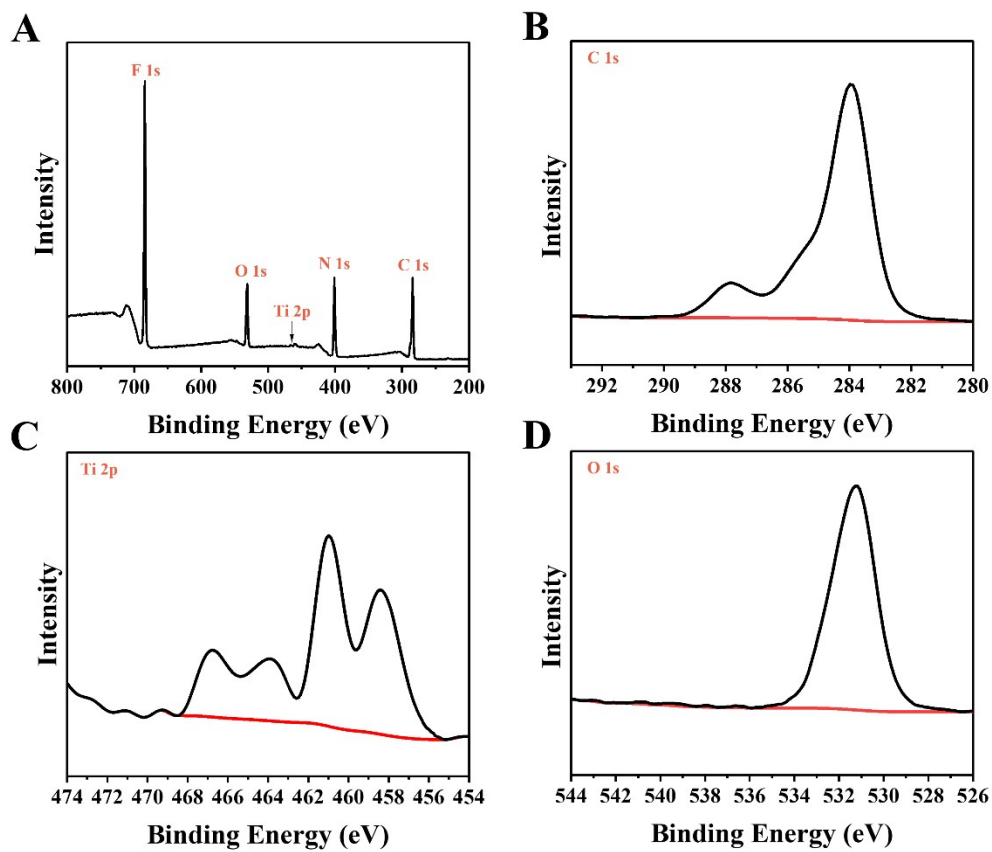

**Fig. S1.** Graphs of XPS for  $\text{Ti}_3\text{C}_2$  QDs. (A) fully scanned spectra (B) C 1s spectrum of  $\text{Ti}_3\text{C}_2$  QDs. (C) Ti 2p (D) O 1s spectrum of  $\text{Ti}_3\text{C}_2$  QDs.

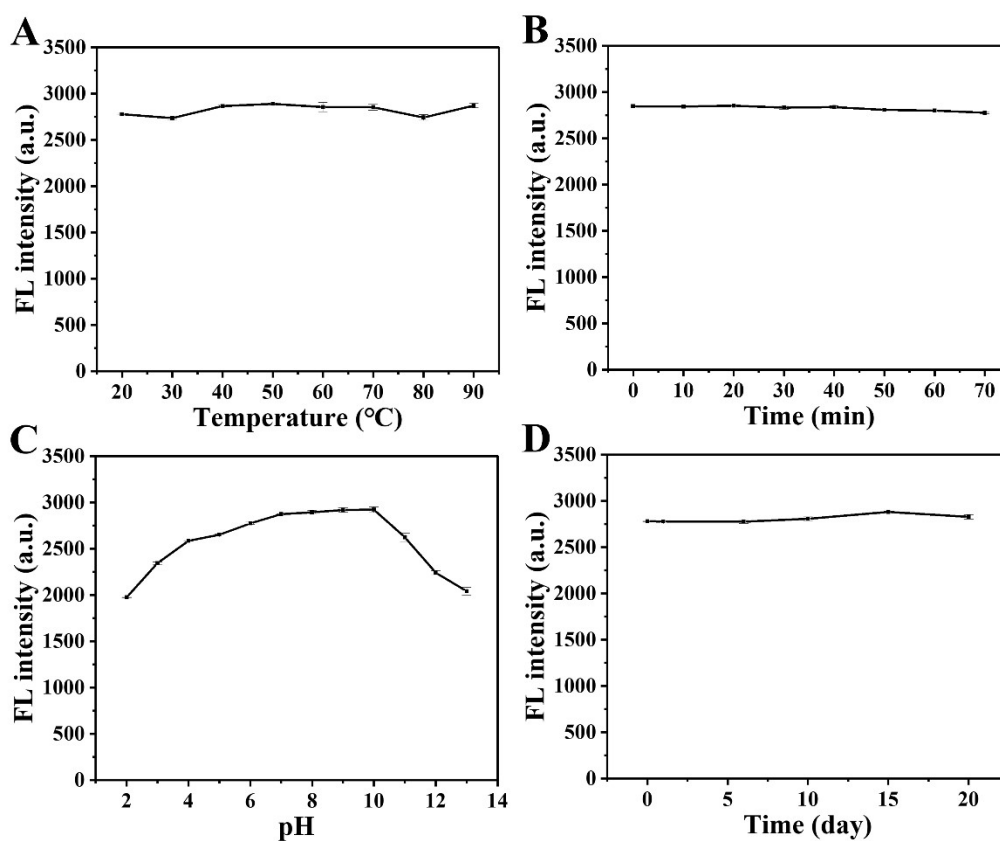

**Fig. S2.** The FL intensity of  $\text{Ti}_3\text{C}_2$  QDs changes with (A) temperature, (B) time (under 365 nm ultraviolet light), (C) pH and (D) time (stored in a refrigerator at 4 °C).

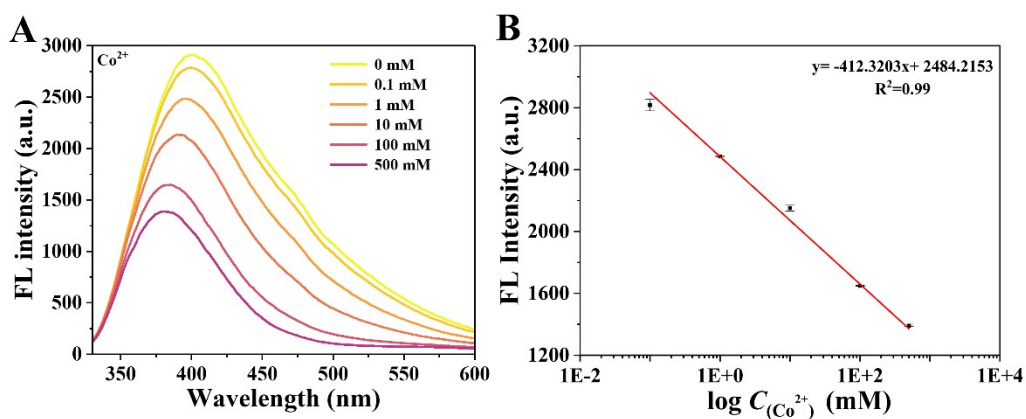

**Fig. S3.** (A) The effect of different concentrations of  $\text{Co}^{2+}$  on the fluorescence of  $\text{Ti}_3\text{C}_2$  QDs. (B) Linear relationships between the fluorescence of  $\text{Ti}_3\text{C}_2$  QDs and the concentration of  $\text{Co}^{2+}$ .

**Table S1** Comparison of quantum yields in different reports.

| Materials                          | Quantum yields (%) | References |
|------------------------------------|--------------------|------------|
| Ti <sub>3</sub> C <sub>2</sub> QDs | 18.7               | 1          |
| Ti <sub>3</sub> C <sub>2</sub> QDs | 10                 | 2          |
| Ti <sub>3</sub> C <sub>2</sub> QDs | 9.36               | 3          |
| Ti <sub>3</sub> C <sub>2</sub> QDs | 7.13               | 4          |
| Ti <sub>3</sub> C <sub>2</sub> QDs | 8.5                | This work  |

**References:**

1. Q. Xu, L. Ding, Y. Wen, W. Yang, H. Zhou, X. Chen, J. Street, A. Zhou, W.-J. Ong and N. Li, *J Mater Chem C*, 2018, **6**, 6360-6369.
2. Q. Xue, H. Zhang, M. Zhu, Z. Pei, H. Li, Z. Wang, Y. Huang, Y. Huang, Q. Deng, J. Zhou, S. Du, Q. Huang and C. Zhi, *Adv Mater*, 2017, **29**.
3. S. Y. Lu, L. Z. Sui, Y. Liu, X. Yong, G. J. Xiao, K. J. Yuan, Z. Y. Liu, B. Z. Liu, B. Zou and B. Yang, *Advanced Science*, 2019, **6**.
4. X. Chen, X. K. Sun, W. Xu, G. C. Pan, D. L. Zhou, J. Y. Zhu, H. Wang, X. Bai, B. A. Dong and H. W. Song, *Nanoscale*, 2018, **10**, 1111-1118.
