# Supplementary figures and images for: “On–off–on” fluorescent sensor based on Ti3C2 quantum dots and CoOOH nanosheets for the detection of ascorbic acid
Source: Royal Society of Chemistry journal article supplement (doi:10.1039/d3nj04736a), 2024-01-01

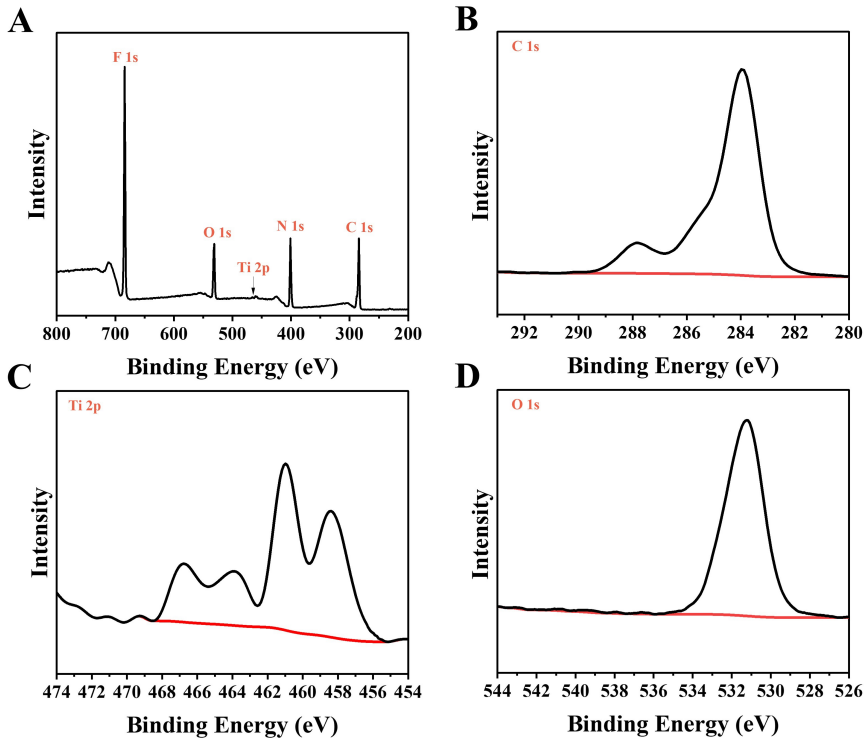

Supplement: d3nj04736a2.pdf [file d3nj04736a2.pdf]

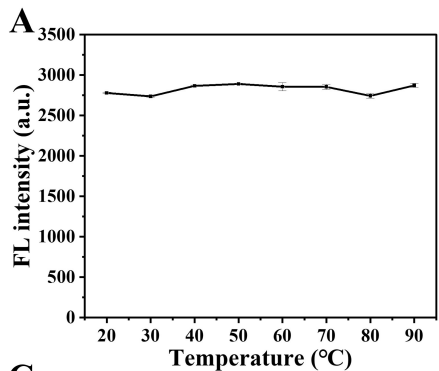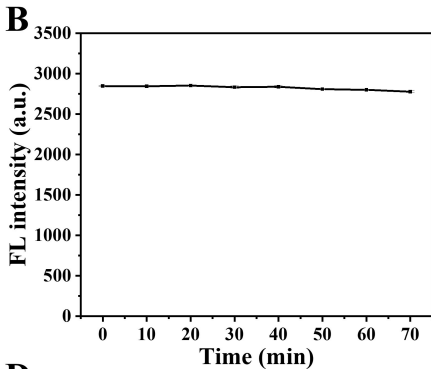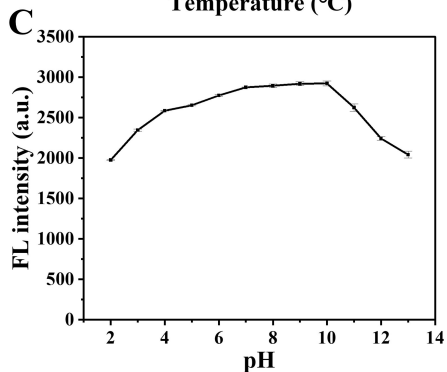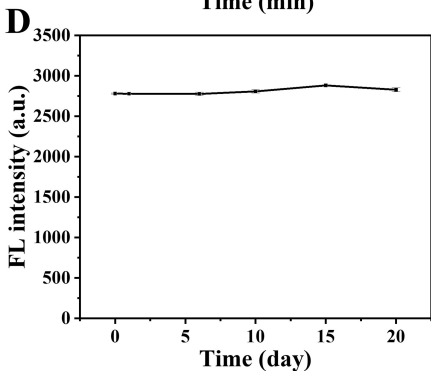

Supplement: d3nj04736a3.pdf [file d3nj04736a3.pdf]

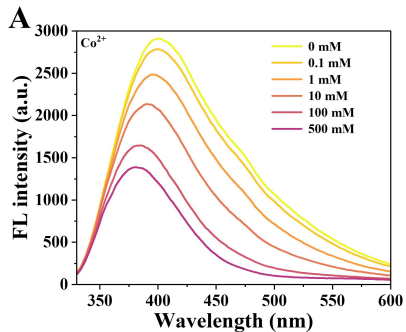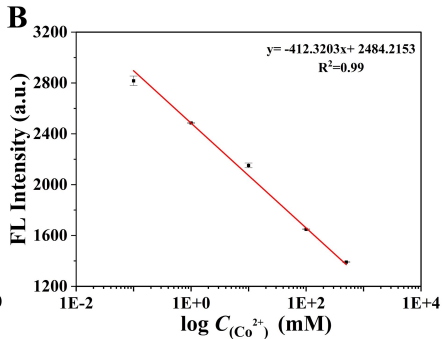

Supplement: d3nj04736a4.pdf [file d3nj04736a4.pdf]
